# Supplementary material
Source: HighWire-hosted journal article supplement (https://diabetes.diabetesjournals.org/content/suppl/2007/10/24/db07-1130)

Our population

HapMap HCB

HapMap JPT

HapMap CEU

HapMap YRI

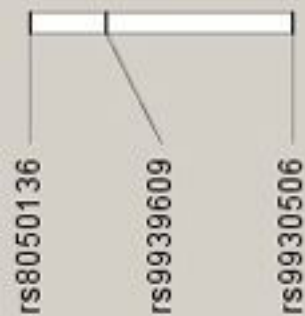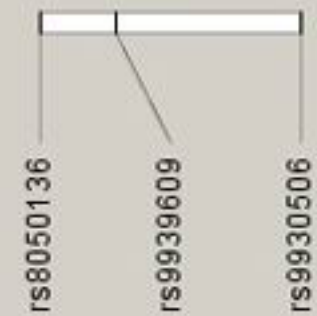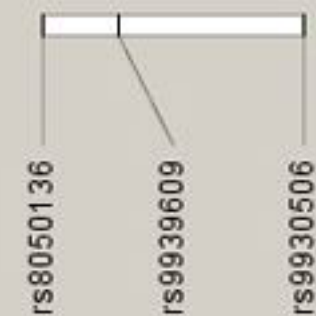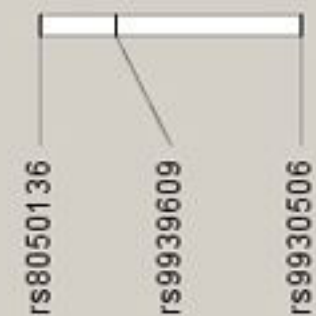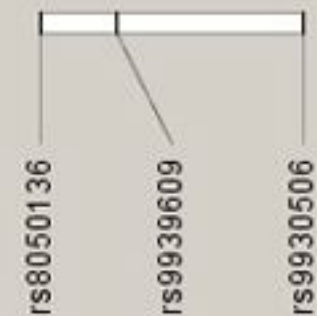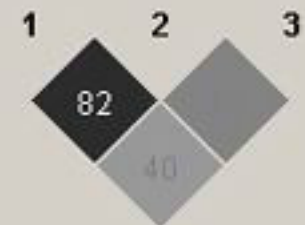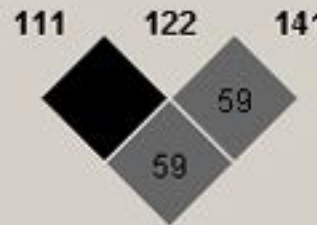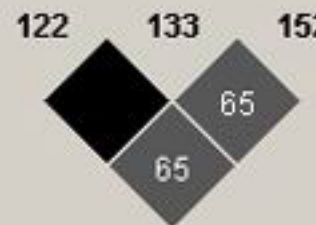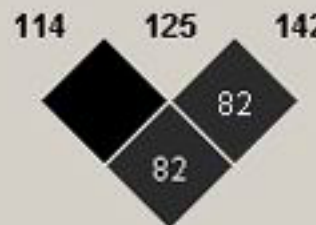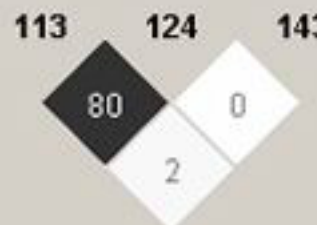

Supplement: db071130OnlineAppendixFig1.pdf [file db071130OnlineAppendixFig1.pdf]
